# Supplementary material for: Next-Generation Sequencing and MALDI Mass Spectrometry in the Study of Multiresistant Processed Meat Vancomycin-Resistant Enterococci (VRE)
Source: PubMed Central journal article supplement (PMC7284646; doi:10.3390/biology9050089), 2020-04-27
Supplement: biology-09-00089-s001.pdf [file biology-09-00089-s001.pdf]

**Table S1:** Exclusive masses found for each antibiotic

| Peak (m/z)           | Model |      |          | Standard deviation         |                            | AUC  |
|----------------------|-------|------|----------|----------------------------|----------------------------|------|
|                      | GA    | SNN  | QC       | Class standard deviation 1 | Class standard deviation 2 |      |
| <b>Tetracycline</b>  |       |      |          |                            |                            |      |
| 6036.59              | 1.41  |      | 8.21E-19 | 1.42                       | 2.7                        | 0.90 |
| <b>Teicoplanin</b>   |       |      |          |                            |                            |      |
| 2970.87              |       | 0.10 | 1.94E-26 | 2.48                       | 3.79                       | 0.95 |
| 4423.75              | 1.13  | 0.01 | 4.33E-23 | 21.53                      | 17.95                      | 0.91 |
| 4526.36              | 1.46  | 0.03 | 9.98E-25 | 2.19                       | 3.23                       | 0.94 |
| 4652.66              | 0.12  | 0.03 |          | 0.81                       | 0.92                       | 0.54 |
| 6049.18              | 1.22  | 0.01 |          | 3.23                       | 3.35                       | 0.91 |
| <b>Ciprofloxacin</b> |       |      |          |                            |                            |      |
| 6358.27              | 0.49  |      |          | 1.71                       | 1.46                       | 0.77 |
| 13237.3              |       | 0.02 |          | 0.34                       | 0.06                       | 0.68 |
| <b>Ampicillin</b>    |       |      |          |                            |                            |      |
| 2361.38              |       | 0.02 |          | 1.54                       | 0.61                       | 0.80 |
| 3304.92              | 0.81  |      |          | 1.53                       | 1.27                       | 0.84 |
| 7240.29              |       | 0.01 |          | 1.68                       | 3.14                       | 0.67 |
| <b>Vancomycin</b>    |       |      |          |                            |                            |      |
| 3255.03              |       | 0.11 |          | 2.14                       | 1                          | 0.73 |
| 3454.55              | 0.98  | 0.14 |          | 1.49                       | 0.78                       | 0.86 |
| 3665.36              |       | 0.03 |          | 12.02                      | 9.91                       | 0.63 |
| 5352.64              |       | 0.01 |          | 8.25                       | 13.6                       | 0.83 |
| 5988.57              |       | 0.02 |          | 2.99                       | 5.1                        | 0.81 |
| 8738.67              |       | 0.01 |          | 1.14                       | 0.04                       | 0.97 |
| 9234.06              |       | 0.01 |          | 1.13                       | 0.25                       | 0.82 |
| 9950.35              |       | 0.03 |          | 0.72                       | 0.07                       | 0.87 |

|          |  |      |  |      |      |      |
|----------|--|------|--|------|------|------|
| 10072.31 |  | 0.01 |  | 8.42 | 2.06 | 0.72 |
| 10224.25 |  | 0.01 |  | 1.59 | 0.53 | 0.72 |
| 12209.66 |  | 0.03 |  | 0.2  | 0.03 | 0.97 |
| 12983.05 |  | 0.04 |  | 0.23 | 0.01 | 0.96 |
